# Supplementary figures and images for: Loss of ninein interferes with osteoclast formation and causes premature ossification
Source: eLife journal article supplement (doi:10.7554/elife.93457), 2024-06-05

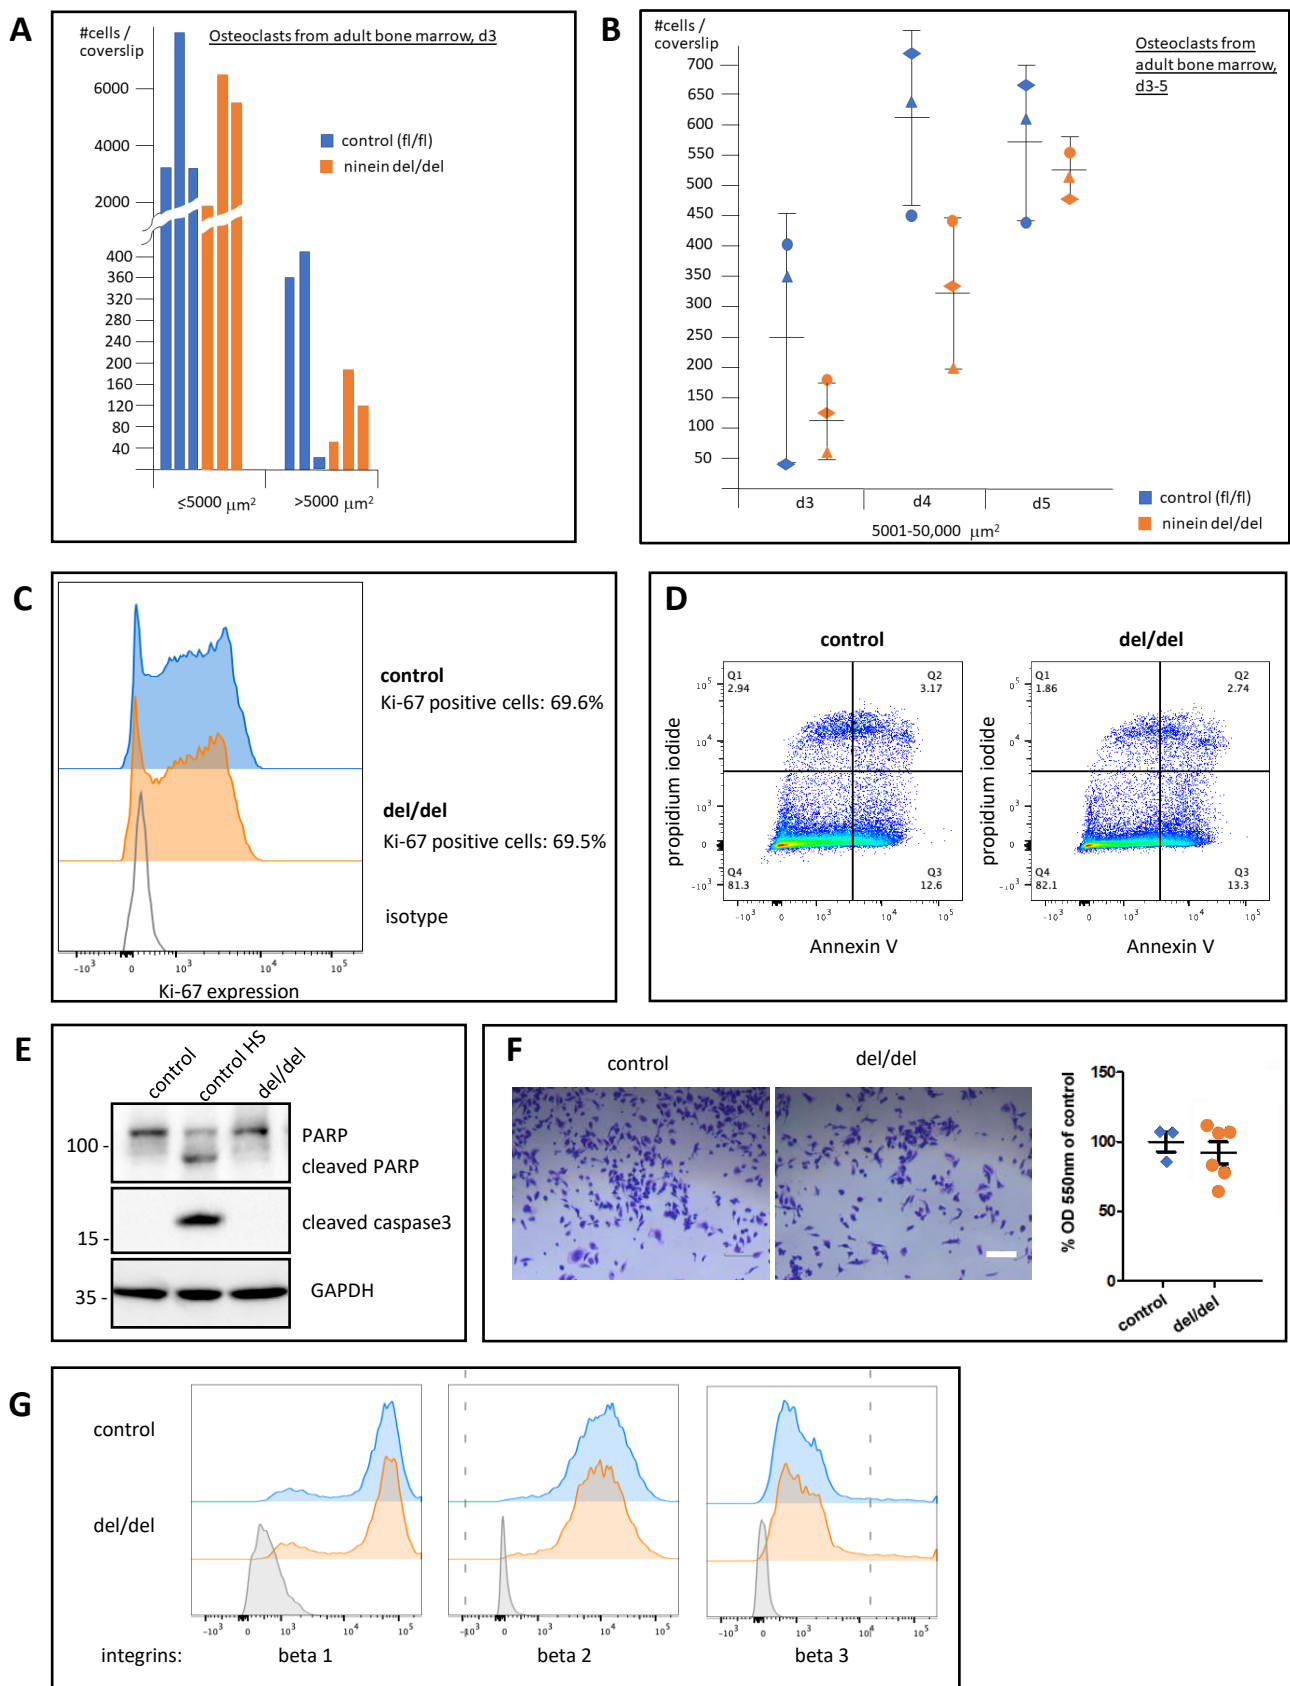

Figure 7 – figure supplement 1

Supplement: supp [file elife-93457-supp-v1.zip]

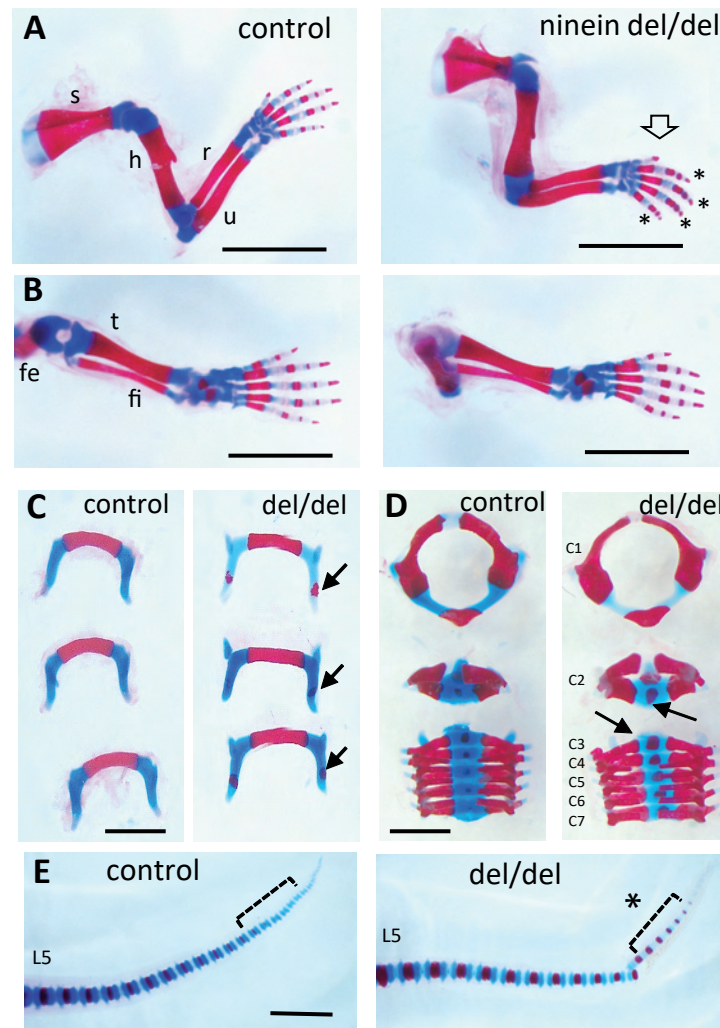

Figure 3 - figure supplement 1

Supplement: supp [file elife-93457-supp-v1.zip]

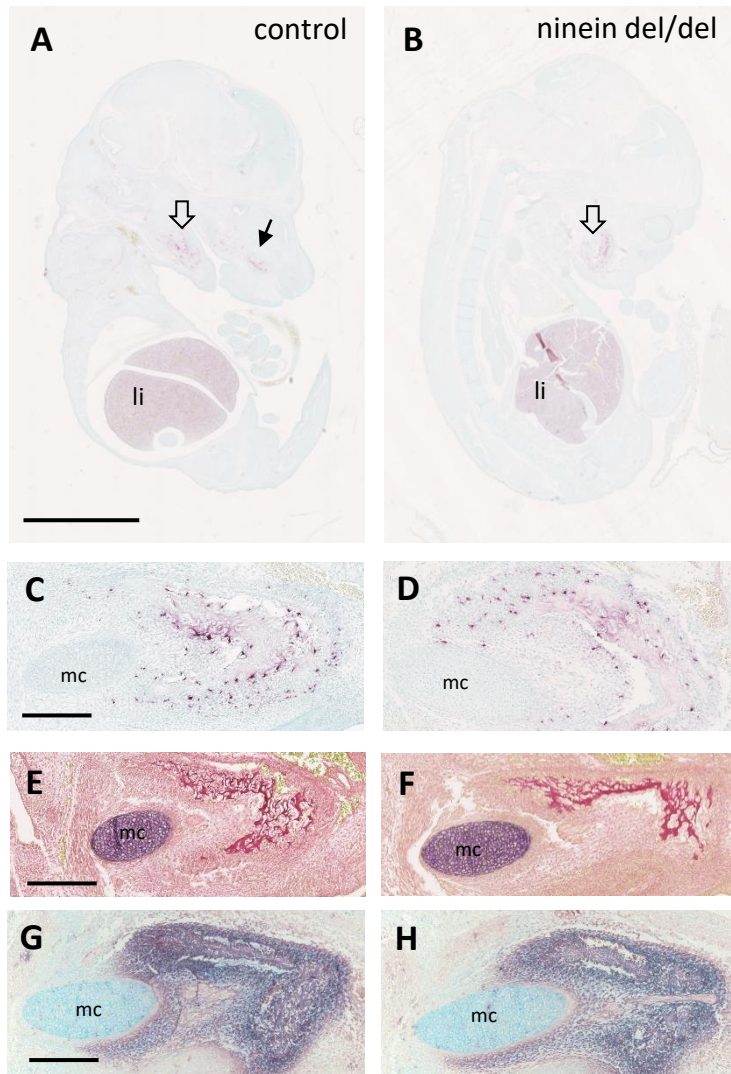

Figure 6 – figure supplement 1

Supplement: supp [file elife-93457-supp-v1.zip]
